# Supplementary material for: Selective Cu and Ni-MOFs as pre-catalysts for the hydrogenation of furfural to furfuryl alcohol
Source: Royal Society of Chemistry journal article supplement (doi:10.1039/d3dt00671a), 2023-01-01
Supplement: d3dt00671a1.pdf [file d3dt00671a1.pdf]

## Supporting information

### **Selective Cu and Ni-MOFs as pre-catalysts for the hydrogenation of furfural to furfuryl alcohol**

Pamela S. Moyo<sup>a</sup>, Banele Vatsha<sup>a</sup>, Gift Mehlana<sup>b\*</sup>, Leah C. Matsinha<sup>a\*</sup> and Banothile C.E. Makhubela<sup>a\*</sup>

<sup>a</sup>Research Centre for Synthesis and Catalysis, Department of Chemical Sciences, University of Johannesburg, Auckland Park 2006, Johannesburg, South Africa.

<sup>b</sup>Department of Chemical Sciences, Midlands State University, 9055 Senga Road, Gweru, Zimbabwe.

#### **Author Information**

Corresponding authors

Email\*: [leahmatsinha@gmail.com](mailto:leahmatsinha@gmail.com), [mehlanag@staff.msu.ac.zw](mailto:mehlanag@staff.msu.ac.zw) and [bmakhubela@uj.ac.za](mailto:bmakhubela@uj.ac.za).

#### **Characterisation**

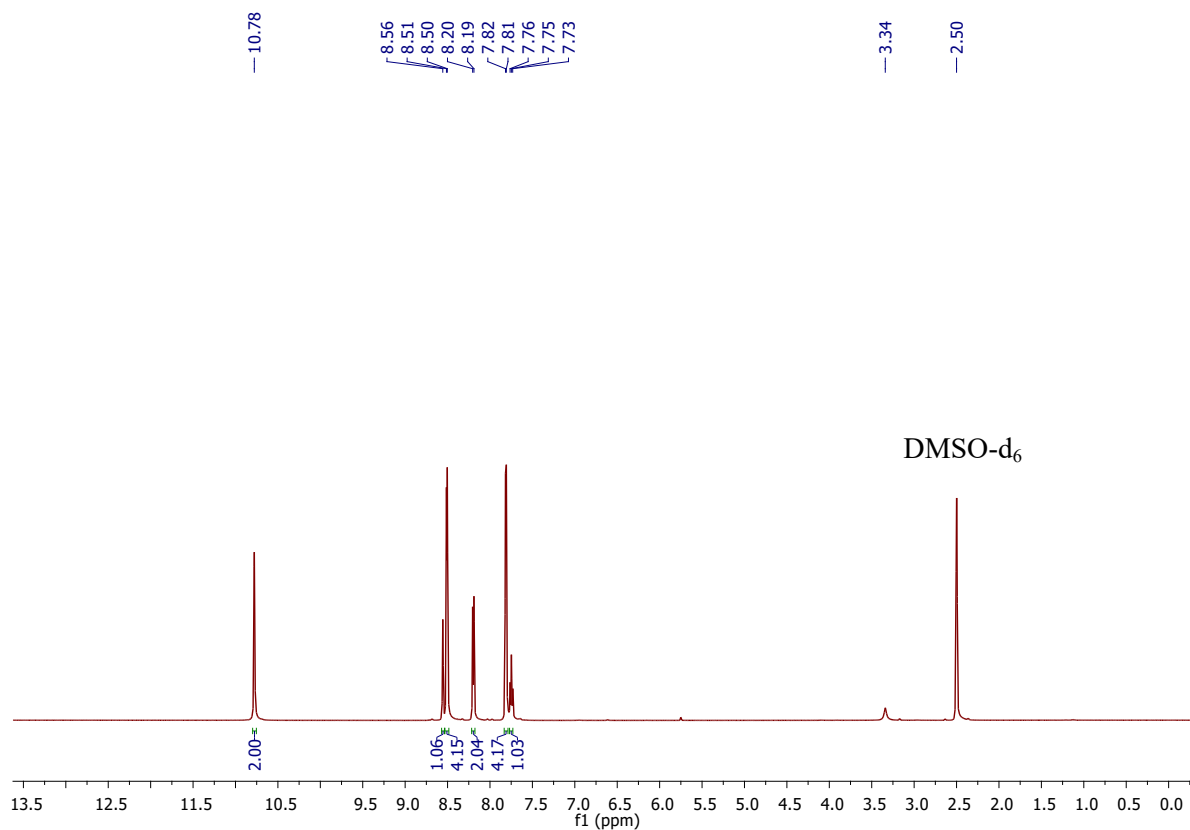

Figure SI 1:  $^1\text{H}$  NMR spectrum of L1, recorded in DMSO-d<sub>6</sub>.

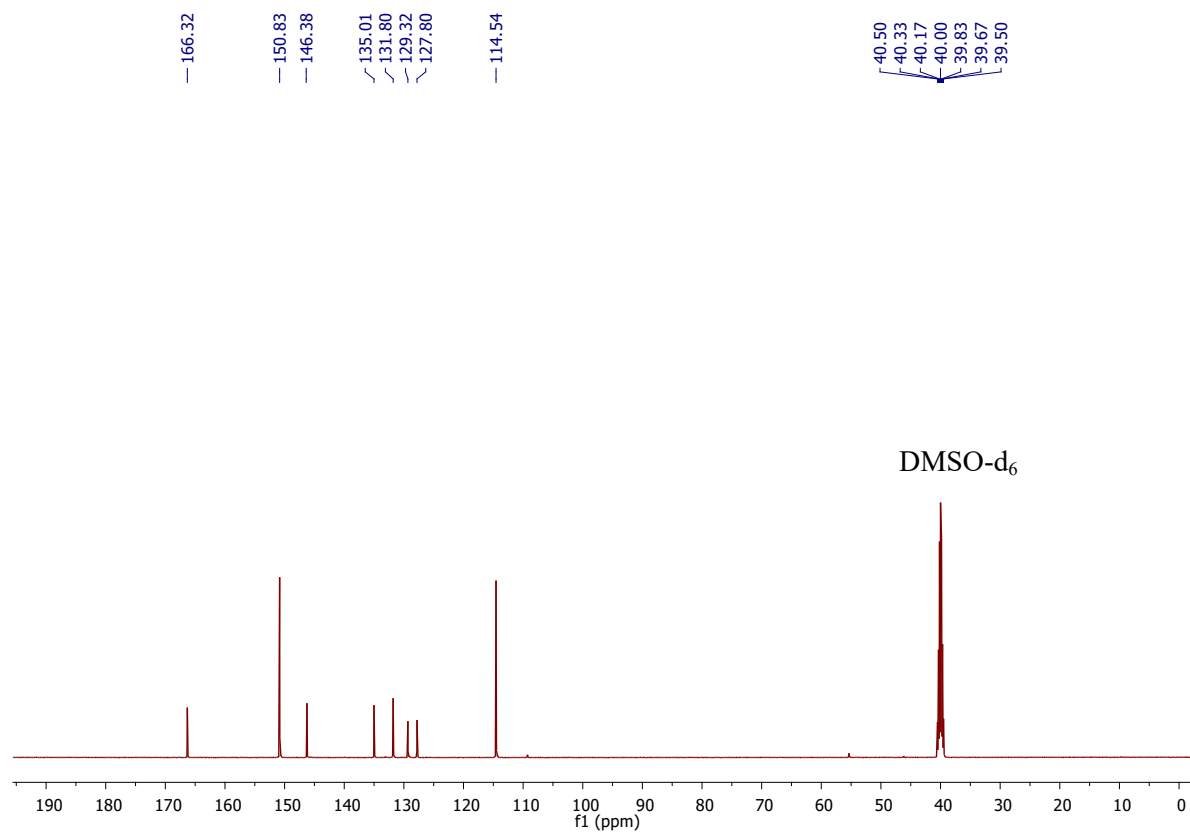

Figure SI 2:  $^{13}\text{C}\{\text{H}\}$  NMR spectrum of L1, recorded in DMSO-d<sub>6</sub>.

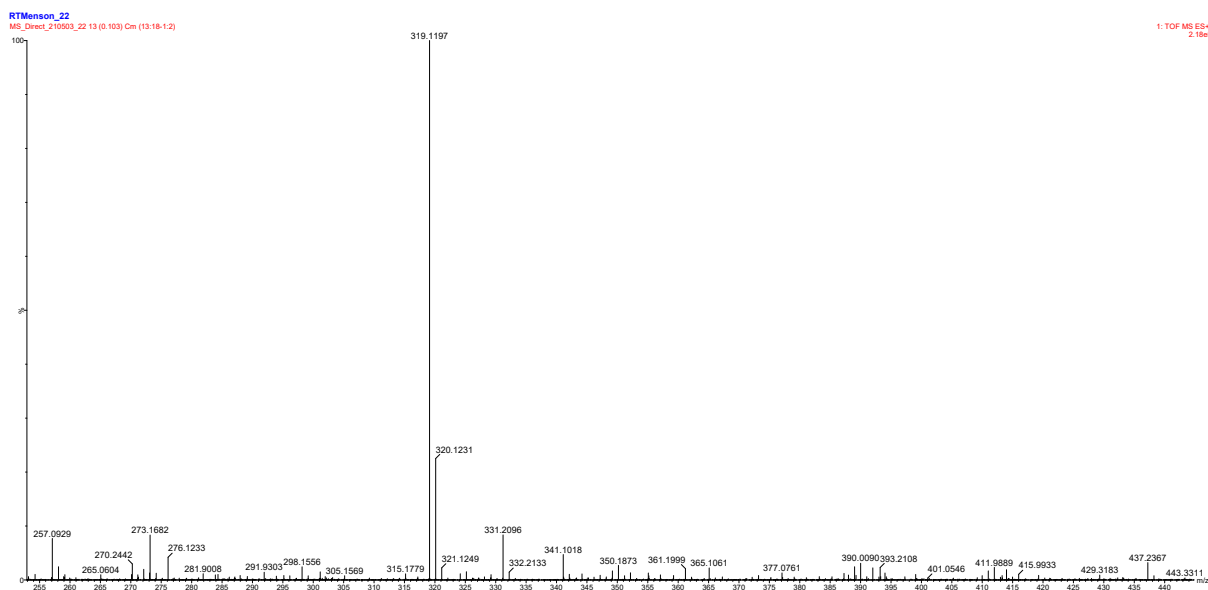

**Figure SI 3:** High resolution electrospray ionisation-mass spectrum for **L1**.

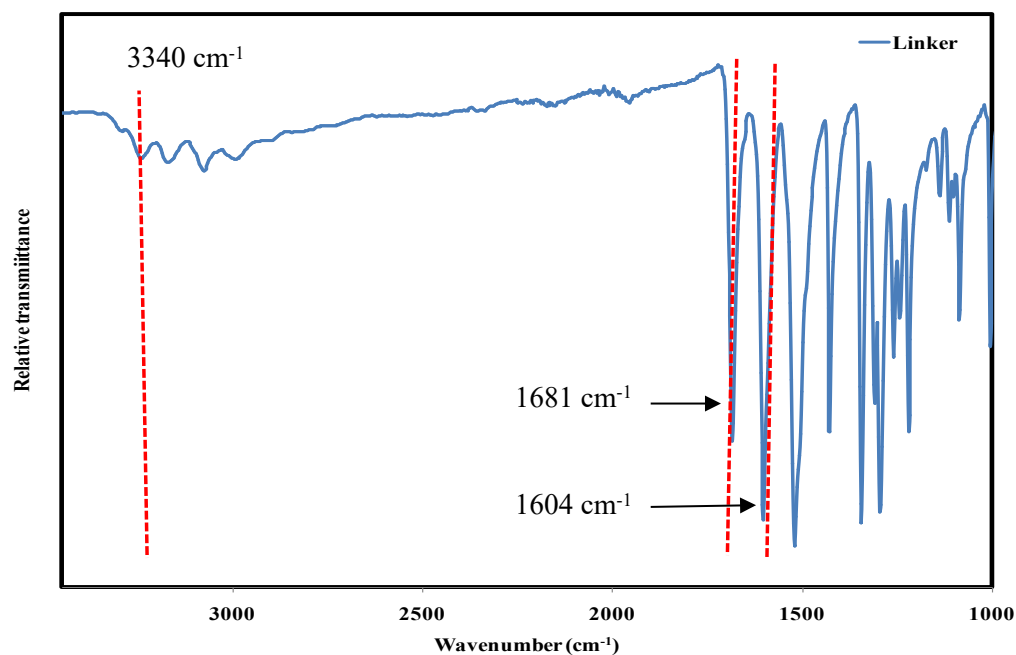

**Figure SI 4:** FT-IR spectrum of **L1**.

**Table SI 1: Fractional Atomic Coordinates ( $\times 10^4$ ) and Equivalent Isotropic Displacement Parameters ( $\text{\AA}^2 \times 10^3$ ) for ligand **L1**.  $U_{eq}$  is defined as 1/3 of the trace of the orthogonalised  $U_{ij}$  tensor.**

| Atom | x           | y       | z          | $U_{eq}$ |
|------|-------------|---------|------------|----------|
| O001 | 10433.4(18) | 1863(2) | 9228.7(16) | 69.5(7)  |
| N002 | 9406(2)     | 3973(3) | 8558.7(16) | 51.1(6)  |
| N003 | 5581.0(19)  | 2567(3) | 5425.1(17) | 51.8(6)  |
| N004 | 2891(2)     | 4412(3) | 2873.2(19) | 60.6(7)  |
| N005 | 12002(2)    | 7275(3) | 9582.7(19) | 61.3(7)  |

|      |          |         |            |         |
|------|----------|---------|------------|---------|
| O006 | 4523(2)  | 1063(3) | 5951.0(17) | 89.4(9) |
| C007 | 4665(2)  | 3177(3) | 4587(2)    | 47.4(7) |
| C008 | 7484(2)  | 2008(3) | 7382(2)    | 49.4(7) |
| C009 | 10295(2) | 5035(3) | 8928(2)    | 48.3(7) |
| C00A | 8436(2)  | 1559(3) | 8237(2)    | 48.7(7) |
| C00B | 9517(3)  | 2469(3) | 8723(2)    | 52.3(8) |
| C00C | 4883(3)  | 3707(3) | 3795(2)    | 53.1(8) |
| C00D | 6523(2)  | 1104(3) | 6960(2)    | 50.7(8) |
| C00E | 10028(3) | 6515(3) | 8671(2)    | 55.8(8) |
| C00F | 5461(3)  | 1563(3) | 6078(2)    | 58.0(8) |
| C00G | 6513(3)  | -265(3) | 7394(2)    | 58.5(8) |
| C00H | 3558(3)  | 3308(3) | 4514(2)    | 59.3(8) |
| C00I | 3978(3)  | 4302(3) | 2970(2)    | 59.5(8) |
| C00J | 10892(3) | 7557(3) | 9009(2)    | 59.8(8) |
| C00K | 8405(3)  | 178(3)  | 8654(2)    | 56.8(8) |
| C00L | 11438(3) | 4706(4) | 9548(2)    | 61.6(9) |
| C00M | 7456(3)  | -718(3) | 8238(2)    | 60.3(8) |
| C00N | 12230(3) | 5857(4) | 9844(2)    | 67.4(9) |
| C00O | 2716(3)  | 3919(4) | 3661(3)    | 63.4(9) |

**Table SI 2: Anisotropic Displacement Parameters ( $\text{\AA}^2 \times 10^3$ ) for ligand L1. The Anisotropic displacement factor exponent takes the form:  $2\pi^2[\text{h}^2\text{a}^{*2}\text{U}_{11}+2\text{hka}^*\text{b}^*\text{U}_{12}+\dots]$ .**

| Atom | $\text{U}_{11}$ | $\text{U}_{22}$ | $\text{U}_{33}$ | $\text{U}_{12}$ | $\text{U}_{13}$ | $\text{U}_{23}$ |
|------|-----------------|-----------------|-----------------|-----------------|-----------------|-----------------|
| O001 | 48.3(14)        | 61.3(14)        | 79.6(15)        | 10.1(11)        | 7.6(12)         | 17.6(12)        |
| N002 | 38.9(14)        | 47.6(15)        | 54.7(14)        | 1.2(11)         | 7.5(11)         | 2.4(12)         |
| N003 | 39.5(14)        | 54.1(14)        | 52.5(14)        | -4.9(12)        | 10.1(12)        | 3.4(12)         |
| N004 | 48.5(17)        | 54.2(16)        | 66.8(17)        | -0.4(13)        | 11.7(14)        | 4.3(13)         |
| N005 | 47.3(17)        | 66.7(19)        | 64.3(17)        | -0.2(13)        | 17.7(14)        | -2.7(14)        |
| O006 | 55.0(16)        | 113(2)          | 79.6(16)        | -30.0(14)       | 7.7(13)         | 30.0(14)        |
| C007 | 38.7(17)        | 46.5(16)        | 49.1(17)        | -3.6(13)        | 10.5(14)        | -4.7(13)        |
| C008 | 49.4(18)        | 47.5(17)        | 48.0(17)        | 2.6(15)         | 17.0(15)        | 4.7(14)         |
| C009 | 39.4(17)        | 54.4(18)        | 45.8(16)        | 2.7(14)         | 12.5(13)        | -1.4(14)        |
| C00A | 47.8(18)        | 46.1(17)        | 48.0(16)        | 4.2(14)         | 15.7(15)        | 1.3(14)         |
| C00B | 50(2)           | 54.7(19)        | 49.0(17)        | 5.7(16)         | 17.0(15)        | 4.5(15)         |
| C00C | 42.6(18)        | 54.3(18)        | 57.2(18)        | 0.0(14)         | 15.7(16)        | 0.5(15)         |
| C00D | 52(2)           | 47.6(18)        | 48.1(17)        | -1.7(15)        | 16.2(15)        | -0.7(14)        |
| C00E | 43.0(19)        | 55(2)           | 56.2(18)        | 6.1(15)         | 7.7(15)         | 1.8(15)         |
| C00F | 49(2)           | 60(2)           | 55.2(19)        | -15.7(16)       | 11.9(16)        | 0.3(16)         |
| C00G | 59(2)           | 46.9(19)        | 65(2)           | -7.0(15)        | 22.4(18)        | -3.6(16)        |
| C00H | 47(2)           | 70(2)           | 57.7(19)        | -3.7(16)        | 18.5(16)        | 3.1(16)         |
| C00I | 60(2)           | 55.9(19)        | 56.8(19)        | -0.8(16)        | 18.4(17)        | 3.9(15)         |
| C00J | 50(2)           | 54.4(19)        | 70(2)           | -0.7(17)        | 20.1(17)        | -4.2(16)        |
| C00K | 61(2)           | 47.9(18)        | 55.2(18)        | 6.9(16)         | 17.5(16)        | 6.7(15)         |
| C00L | 41.1(19)        | 59(2)           | 71(2)           | 4.5(16)         | 9.8(16)         | 8.0(16)         |
| C00M | 68(2)           | 46.0(18)        | 63(2)           | 2.3(17)         | 23.2(18)        | 8.9(16)         |

|      |          |       |       |         |          |         |
|------|----------|-------|-------|---------|----------|---------|
| C00N | 37.3(19) | 78(2) | 73(2) | 6.5(18) | 8.5(16)  | 9.6(19) |
| C00O | 43(2)    | 66(2) | 76(2) | 1.0(16) | 20.4(18) | 0.4(18) |

**Table SI 3: Bond Lengths for ligand L1.**

| Atom Atom | Length/Å | Atom Atom | Length/Å |
|-----------|----------|-----------|----------|
| O001 C00B | 1.217(3) | C008 C00D | 1.380(4) |
| N002 C009 | 1.403(4) | C009 C00E | 1.384(4) |
| N002 C00B | 1.369(4) | C009 C00L | 1.386(4) |
| N003 C007 | 1.403(3) | C00A C00B | 1.499(4) |
| N003 C00F | 1.366(4) | C00A C00K | 1.390(4) |
| N004 C00I | 1.332(4) | C00C C00I | 1.380(4) |
| N004 C00O | 1.336(4) | C00D C00F | 1.485(4) |
| N005 C00J | 1.332(4) | C00D C00G | 1.386(4) |
| N005 C00N | 1.326(4) | C00E C00J | 1.369(4) |
| O006 C00F | 1.213(3) | C00G C00M | 1.375(4) |
| C007 C00C | 1.382(4) | C00H C00O | 1.375(4) |
| C007 C00H | 1.371(4) | C00K C00M | 1.364(4) |
| C008 C00A | 1.388(4) | C00L C00N | 1.380(4) |

**Table SI 4: Bond Angles for ligand L1.**

| Atom Atom Atom | Angle/°  | Atom Atom Atom | Angle/°  |
|----------------|----------|----------------|----------|
| C00B N002 C009 | 126.5(2) | C00I C00C C007 | 118.7(3) |
| C00F N003 C007 | 125.0(2) | C00F C00D C008 | 122.7(3) |
| C00O N004 C00I | 114.9(3) | C00G C00D C008 | 119.4(3) |
| C00N N005 C00J | 114.2(3) | C00G C00D C00F | 117.8(3) |
| C00C C007 N003 | 118.9(3) | C00J C00E C009 | 119.3(3) |
| C00H C007 N003 | 123.5(3) | O006 C00F N003 | 121.7(3) |
| C00H C007 C00C | 117.5(3) | C00D C00F N003 | 117.6(3) |
| C00D C008 C00A | 120.6(3) | C00D C00F O006 | 120.6(3) |
| C00E C009 N002 | 118.8(3) | C00M C00G C00D | 120.2(3) |
| C00L C009 N002 | 124.3(3) | C00O C00H C007 | 119.4(3) |
| C00L C009 C00E | 116.9(3) | C00C C00I N004 | 124.9(3) |
| C00B C00A C008 | 123.5(3) | C00E C00J N005 | 125.3(3) |
| C00K C00A C008 | 118.7(3) | C00M C00K C00A | 120.9(3) |
| C00K C00A C00B | 117.8(3) | C00N C00L C009 | 118.3(3) |
| N002 C00B O001 | 123.4(3) | C00K C00M C00G | 120.2(3) |
| C00A C00B O001 | 120.1(3) | C00L C00N N005 | 125.9(3) |
| C00A C00B N002 | 116.6(3) | C00H C00O N004 | 124.6(3) |

**Table SI 5: Hydrogen Atom Coordinates ( $\text{\AA} \times 10^4$ ) and Isotropic Displacement Parameters ( $\text{\AA}^2 \times 10^3$ ) for ligand L1.**

| Atom | x       | y        | z       | U(eq)    |
|------|---------|----------|---------|----------|
| H00K | 9039(3) | -139(3)  | 9223(2) | 68.1(10) |
| H00M | 7447(3) | -1639(3) | 8526(2) | 72.4(10) |

|      |          |         |            |          |
|------|----------|---------|------------|----------|
| H00G | 5867(3)  | -878(3) | 7115(2)    | 70.2(10) |
| H008 | 7494(2)  | 2926(3) | 7092(2)    | 59.3(9)  |
| H00N | 12991(3) | 5617(4) | 10265(2)   | 80.9(11) |
| H00J | 10686(3) | 8542(3) | 8822(2)    | 71.7(10) |
| H00E | 9269(3)  | 6798(3) | 8273(2)    | 67(1)    |
| H00L | 11666(3) | 3735(4) | 9758(2)    | 73.9(10) |
| H00I | 4139(3)  | 4652(3) | 2444(2)    | 71.4(10) |
| H00O | 1972(3)  | 3995(4) | 3630(3)    | 76.1(11) |
| H00H | 3379(3)  | 2985(3) | 5037(2)    | 71.2(10) |
| H00C | 5624(3)  | 3664(3) | 3817(2)    | 63.7(9)  |
| H002 | 8723(2)  | 4300(3) | 8192.3(16) | 61.3(8)  |

**Table SI 6 Anisotropic Displacement Parameters ( $\text{\AA}^2 \times 10^3$ ) for MOF 1. The Anisotropic displacement factor exponent takes the form:  $-2\pi^2[h^2a^{*2}U_{11}+2hka^*b^*U_{12}+\dots]$ .**

| Atom | $U_{11}$ | $U_{22}$ | $U_{33}$ | $U_{23}$ | $U_{13}$ | $U_{12}$ |
|------|----------|----------|----------|----------|----------|----------|
| Cu1  | 9.6(6)   | 18.3(7)  | 12.2(6)  | 0        | 0        | 0        |
| N2   | 13(2)    | 20(2)    | 18(2)    | -1.6(19) | 0.3(17)  | 2.2(19)  |
| O4   | 20(2)    | 56(3)    | 27(2)    | -14(2)   | -4.8(18) | 14(2)    |
| N3   | 16(2)    | 27(3)    | 25(2)    | -7(2)    | -4.7(18) | 7(2)     |
| C5   | 14(2)    | 20(3)    | 22(3)    | -4(2)    | 1(2)     | 2(2)     |
| C1   | 14(2)    | 23(3)    | 20(2)    | -3(2)    | -2(2)    | 2(2)     |
| C7   | 17(2)    | 14(3)    | 19(2)    | -0.1(19) | -1.8(19) | -2(2)    |
| C6   | 16(2)    | 22(3)    | 16(2)    | 1(2)     | -1.0(19) | -1(2)    |
| C2   | 14(2)    | 24(3)    | 21(3)    | -6(2)    | 0(2)     | 4(2)     |
| C10  | 18(3)    | 30(4)    | 14(3)    | 0        | 0        | -4(3)    |
| C8   | 18(3)    | 19(3)    | 19(2)    | -2(2)    | 3(2)     | 1(2)     |
| C4   | 14(2)    | 23(3)    | 27(3)    | -7(2)    | 1(2)     | 3(2)     |
| C9   | 24(4)    | 31(4)    | 15(3)    | 0        | 0        | 4(4)     |
| N4B  | 21(5)    | 34(6)    | 49(4)    | -3(5)    | 11(4)    | 1(4)     |
| C3   | 14(2)    | 23(2)    | 21(2)    | -3(2)    | -1(2)    | 2(2)     |
| O5B  | 20(5)    | 30(5)    | 40(6)    | -9(4)    | 2(4)     | 4(4)     |
| C13A | 28(9)    | 34(8)    | 48(6)    | -4(6)    | 10(7)    | 6(7)     |
| C11B | 20(5)    | 29(5)    | 46(5)    | -6(4)    | 7(4)     | 1(4)     |
| C11A | 22(5)    | 31(6)    | 45(5)    | -7(4)    | 2(4)     | 0(4)     |
| O5A  | 24(4)    | 29(5)    | 43(5)    | -8(4)    | 5(4)     | 4(4)     |
| C13B | 30(10)   | 42(9)    | 48(7)    | -5(6)    | 17(7)    | -6(8)    |
| C12A | 28(6)    | 36(7)    | 66(7)    | -1(6)    | 11(6)    | 8(5)     |
| N4A  | 25(5)    | 31(6)    | 47(4)    | -5(4)    | 9(4)     | 1(4)     |
| C12B | 33(7)    | 52(8)    | 72(9)    | 8(7)     | 15(7)    | 18(6)    |
| N5   | 29(4)    | 17(3)    | 23(5)    | 2(3)     | -11(3)   | 0(3)     |
| O1   | 36(8)    | 21(3)    | 42(7)    | 1(5)     | 3(6)     | -3(4)    |

**Table SI 6 Anisotropic Displacement Parameters ( $\text{\AA}^2 \times 10^3$ ) for MOF 1. The Anisotropic displacement factor exponent takes the form:  $-2\pi^2[h^2a^{*2}U_{11}+2hka^*b^*U_{12}+\dots]$ .**

| Atom | $U_{11}$ | $U_{22}$ | $U_{33}$ | $U_{23}$ | $U_{13}$ | $U_{12}$ |
|------|----------|----------|----------|----------|----------|----------|
| O2   | 47(4)    | 22(3)    | 41(13)   | 2(5)     | -27(7)   | 14(5)    |
| O3   | 31(4)    | 26(4)    | 31(5)    | 0(4)     | -6(4)    | -8(3)    |

**Table SI 7: Bond Lengths for MOF 1.**

| Atom | Atom            | Length/ $\text{\AA}$ | Atom | Atom | Length/ $\text{\AA}$ |
|------|-----------------|----------------------|------|------|----------------------|
| Cu1  | N2 <sup>1</sup> | 2.029(4)             | C2   | C3   | 1.398(8)             |
| Cu1  | N2              | 2.030(4)             | C8   | C9   | 1.392(7)             |
| Cu1  | N2 <sup>2</sup> | 2.029(4)             | C4   | C3   | 1.398(8)             |
| Cu1  | N2 <sup>3</sup> | 2.029(4)             | N4B  | C11B | 1.35(2)              |
| Cu1  | O1              | 2.433(8)             | N4B  | C13B | 1.41(3)              |
| N2   | C5              | 1.351(7)             | N4B  | C12B | 1.39(2)              |
| N2   | C1              | 1.354(7)             | O5B  | C11B | 1.21(2)              |
| O4   | C6              | 1.206(7)             | C13A | N4A  | 1.43(3)              |
| N3   | C6              | 1.379(7)             | C11A | O5A  | 1.26(2)              |
| N3   | C3              | 1.396(7)             | C11A | N4A  | 1.32(2)              |
| C5   | C4              | 1.365(8)             | C12A | N4A  | 1.48(3)              |
| C1   | C2              | 1.377(8)             | N5   | O1   | 1.248(12)            |
| C7   | C6              | 1.504(8)             | N5   | O2   | 1.244(12)            |
| C7   | C10             | 1.390(7)             | N5   | O3   | 1.241(10)            |
| C7   | C8              | 1.389(8)             |      |      |                      |

**Table SI 8: Bond Angles for MOF 1.**

| Atom            | Atom | Atom            | Angle/ $^\circ$ | Atom            | Atom | Atom            | Angle/ $^\circ$ |
|-----------------|------|-----------------|-----------------|-----------------|------|-----------------|-----------------|
| N2 <sup>1</sup> | Cu1  | N2 <sup>2</sup> | 89.1(3)         | N3              | C6   | C7              | 114.7(5)        |
| N2 <sup>3</sup> | Cu1  | N2              | 89.1(3)         | C1              | C2   | C3              | 118.9(5)        |
| N2 <sup>1</sup> | Cu1  | N2              | 179.6(3)        | C7 <sup>4</sup> | C10  | C7              | 120.6(7)        |
| N2 <sup>1</sup> | Cu1  | N2 <sup>3</sup> | 90.9(3)         | C7              | C8   | C9              | 120.1(5)        |
| N2 <sup>2</sup> | Cu1  | N2 <sup>3</sup> | 179.6(3)        | C5              | C4   | C3              | 119.8(5)        |
| N2 <sup>2</sup> | Cu1  | N2              | 90.9(3)         | C8              | C9   | C8 <sup>4</sup> | 120.0(7)        |
| N2 <sup>1</sup> | Cu1  | O1              | 91.5(8)         | C11B            | N4B  | C12B            | 125(2)          |
| N2 <sup>3</sup> | Cu1  | O1              | 94.2(5)         | C13B            | N4B  | C11B            | 133.9(19)       |
| N2 <sup>2</sup> | Cu1  | O1              | 85.4(5)         | C13B            | N4B  | C12B            | 101.0(17)       |
| N2              | Cu1  | O1              | 88.9(8)         | N3              | C3   | C2              | 125.4(5)        |
| C5              | N2   | Cu1             | 120.1(4)        | N3              | C3   | C4              | 116.9(5)        |
| C5              | N2   | C1              | 117.0(5)        | C2              | C3   | C4              | 117.7(5)        |
| C1              | N2   | Cu1             | 122.8(4)        | O5B             | C11B | N4B             | 129(2)          |
| C6              | N3   | C3              | 127.2(5)        | O5A             | C11A | N4A             | 124(2)          |
| N2              | C5   | C4              | 123.2(5)        | C11A            | N4A  | C13A            | 104(2)          |
| N2              | C1   | C2              | 123.4(5)        | C11A            | N4A  | C12A            | 121(2)          |
| C10             | C7   | C6              | 121.4(5)        | C12A            | N4A  | C13A            | 134.6(16)       |
| C8              | C7   | C6              | 119.0(5)        | O2              | N5   | O1              | 119.0(14)       |
| C8              | C7   | C10             | 119.6(5)        | O3              | N5   | O1              | 121.7(10)       |

**Table SI 8: Bond Angles for MOF 1.**

| Atom | Atom | Atom | Angle/°  | Atom | Atom | Atom | Angle/°   |
|------|------|------|----------|------|------|------|-----------|
| O4   | C6   | N3   | 123.7(5) | O3   | N5   | O2   | 119.3(15) |
| O4   | C6   | C7   | 121.6(5) | N5   | O1   | Cu1  | 137.8(10) |

**Table SI 9: Torsion Angles for MOF 1.**

| A   | B  | C   | D               | Angle/°   | A    | B    | C    | D               | Angle/°   |
|-----|----|-----|-----------------|-----------|------|------|------|-----------------|-----------|
| Cu1 | N2 | C5  | C4              | -179.6(5) | C10  | C7   | C6   | O4              | -149.4(5) |
| Cu1 | N2 | C1  | C2              | 178.5(5)  | C10  | C7   | C6   | N3              | 30.5(7)   |
| N2  | C5 | C4  | C3              | 0.8(9)    | C10  | C7   | C8   | C9              | -1.2(8)   |
| N2  | C1 | C2  | C3              | 1.3(9)    | C8   | C7   | C6   | O4              | 30.5(9)   |
| C5  | N2 | C1  | C2              | 0.5(9)    | C8   | C7   | C6   | N3              | -149.7(5) |
| C5  | C4 | C3  | N3              | -178.1(6) | C8   | C7   | C10  | C7 <sup>1</sup> | 0.6(4)    |
| C5  | C4 | C3  | C2              | 1.0(9)    | C3   | N3   | C6   | O4              | 2.4(10)   |
| C1  | N2 | C5  | C4              | -1.6(9)   | C3   | N3   | C6   | C7              | -177.5(5) |
| C1  | C2 | C3  | N3              | 177.1(6)  | O5A  | C11A | N4A  | C13A            | 172.8(18) |
| C1  | C2 | C3  | C4              | -2.0(9)   | O5A  | C11A | N4A  | C12A            | -1(3)     |
| C7  | C8 | C9  | C8 <sup>1</sup> | 0.6(4)    | C13B | N4B  | C11B | O5B             | 0(4)      |
| C6  | N3 | C3  | C2              | 12.0(10)  | C12B | N4B  | C11B | O5B             | -172(2)   |
| C6  | N3 | C3  | C4              | -168.9(6) | O2   | N5   | O1   | Cu1             | -170(3)   |
| C6  | C7 | C10 | C7 <sup>1</sup> | -179.6(6) | O3   | N5   | O1   | Cu1             | 11(4)     |
| C6  | C7 | C8  | C9              | 178.9(4)  |      |      |      |                 |           |

**Table SI 10: Hydrogen Atom Coordinates ( $\text{\AA} \times 10^4$ ) and Isotropic Displacement Parameters ( $\text{\AA}^2 \times 10^3$ ) for MOF 1.**

| Atom | x        | y       | z       | U(eq) |
|------|----------|---------|---------|-------|
| H3   | 7392.56  | 3382.74 | 4762.13 | 27    |
| H5   | 5473.42  | 2894.41 | 3928.02 | 22    |
| H1   | 4263.14  | 4595.18 | 4369.87 | 23    |
| H2   | 5385.72  | 4576.09 | 4785.18 | 24    |
| H10  | 8749.97  | 3750.02 | 4895.12 | 25    |
| H8   | 7341.37  | 3987.76 | 5757.76 | 22    |
| H4   | 6648.74  | 2850.25 | 4318.95 | 25    |
| H9   | 8749.99  | 3749.99 | 6046.13 | 28    |
| H13D | 9424.37  | 2992.99 | 3875.47 | 55    |
| H13E | 10010.04 | 2242.84 | 3827.57 | 55    |
| H13F | 10519.56 | 2955.03 | 3980.37 | 55    |
| H11B | 8933.15  | 2192.42 | 4656.5  | 38    |
| H11A | 8606.04  | 3107.39 | 4175.8  | 39    |
| H13A | 10178.43 | 2188.66 | 3822.58 | 60    |
| H13B | 10888.01 | 2692.27 | 4033.44 | 60    |
| H13C | 9876.19  | 3010.71 | 3922.84 | 60    |
| H12D | 9780.5   | 2025.83 | 4751.88 | 65    |
| H12E | 10735.75 | 1962.17 | 4539.87 | 65    |
| H12F | 9867.92  | 1413.1  | 4469.38 | 65    |



**Table SI 10: Hydrogen Atom Coordinates ( $\text{\AA}\times 10^4$ ) and Isotropic Displacement Parameters ( $\text{\AA}^2\times 10^3$ ) for MOF 1.**

| Atom | $x$      | $y$     | $z$     | U(eq) |
|------|----------|---------|---------|-------|
| H12A | 11047.06 | 1837.12 | 4354.35 | 78    |
| H12B | 10288.43 | 1322.14 | 4171.29 | 78    |
| H12C | 10201.69 | 1464.59 | 4559.12 | 78    |

**Table SI 11: Fractional Atomic Coordinates ( $\times 10^4$ ) and Equivalent Isotropic Displacement Parameters ( $\text{\AA}^2\times 10^3$ ) for MOF 2.  $U_{\text{eq}}$  is defined as 1/3 of the trace of the orthogonalised  $U_{ij}$  tensor.**

| Atom | $x$        | $y$       | $z$         | U(eq)     |
|------|------------|-----------|-------------|-----------|
| Ni01 | 12533.5(4) | 10000     | 6666.666667 | 48.84(16) |
| Cl1  | 12215.6(7) | 9381.0(6) | 5419.4(4)   | 56.1(2)   |
| N3   | 4108(2)    | 6695(2)   | 7280.3(15)  | 53.5(7)   |
| N4   | 3001(2)    | 8853(2)   | 6871.6(14)  | 54.4(7)   |
| N1   | 10937(2)   | 8877(2)   | 6899.1(16)  | 54.9(7)   |
| O2   | 3082(2)    | 5711(2)   | 8208.6(16)  | 81.8(8)   |
| N2   | 7737(2)    | 6702(2)   | 7442.1(16)  | 57.5(8)   |
| O1   | 7424(2)    | 5107(2)   | 6978.3(18)  | 91.1(9)   |
| C12  | 5388(3)    | 4077(3)   | 7738(2)     | 60.8(9)   |
| C7   | 5962(3)    | 5169(3)   | 7519(2)     | 55.0(9)   |
| C13  | 3802(3)    | 5932(3)   | 7781(2)     | 58.0(9)   |
| C16  | 3667(3)    | 7376(3)   | 7155.2(19)  | 56.0(9)   |
| C6   | 7072(3)    | 5611(3)   | 7294(2)     | 61.3(9)   |
| C14  | 2656(3)    | 8205(3)   | 7444.8(18)  | 56.4(9)   |
| C24  | 4382(3)    | 5320(2)   | 7772.1(17)  | 48.2(8)   |
| C3   | 8796(3)    | 7379(3)   | 7255.7(18)  | 51.5(8)   |
| C5   | 10456(3)   | 7864(3)   | 6674(2)     | 62.7(9)   |
| C17  | 4021(3)    | 8005(3)   | 6564(2)     | 62.8(10)  |
| C15  | 2961(3)    | 7464(3)   | 7595.7(19)  | 58.0(9)   |
| C4   | 9398(3)    | 7101(3)   | 6829(2)     | 64.8(10)  |
| C8   | 5434(3)    | 5766(2)   | 7543.6(17)  | 54.3(8)   |
| C11  | 4364(3)    | 3666(3)   | 8010(2)     | 79.3(12)  |
| C10  | 3857(3)    | 4260(3)   | 8036(2)     | 63.4(10)  |
| C1   | 10333(3)   | 9124(3)   | 7326(2)     | 66.4(10)  |
| C18  | 3666(3)    | 8738(3)   | 6431.9(19)  | 66.2(10)  |
| C2   | 9269(3)    | 8407(3)   | 7500(2)     | 65.1(10)  |

**Table SI 12: Anisotropic Displacement Parameters ( $\text{\AA}^2\times 10^3$ ) for MOF 2. The Anisotropic displacement factor exponent takes the form:  $-2\pi^2[h^2a^{*2}U_{11}+2hka^*b^*U_{12}+\dots]$ .**

| Atom | $U_{11}$ | $U_{22}$ | $U_{33}$ | $U_{12}$  | $U_{13}$ | $U_{23}$ |
|------|----------|----------|----------|-----------|----------|----------|
| Ni01 | 41.9(2)  | 48.7(3)  | 58.3(3)  | 24.34(16) | 4.62(14) | 9.2(3)   |
| Cl1  | 57.9(5)  | 52.1(4)  | 59.8(4)  | 28.7(4)   | 6.7(4)   | 9.9(4)   |
| N3   | 51.4(16) | 56.6(17) | 60.1(17) | 32.7(14)  | -3.5(13) | 4.7(14)  |

|     |          |          |          |          |           |           |
|-----|----------|----------|----------|----------|-----------|-----------|
| N4  | 45.7(15) | 57.7(17) | 59.8(16) | 25.9(14) | 6.8(12)   | 9.7(13)   |
| N1  | 46.8(16) | 56.5(19) | 66.0(18) | 29.3(14) | 6.1(14)   | -1.7(14)  |
| O2  | 80.0(19) | 75.5(18) | 97(2)    | 43.9(16) | 16.6(17)  | 31.0(17)  |
| N2  | 47.6(17) | 42.6(16) | 79.6(19) | 20.6(14) | 3.9(14)   | -10.8(13) |
| O1  | 70.1(19) | 60.4(16) | 144(3)   | 33.3(14) | 4.8(18)   | -30.9(19) |
| C12 | 56(2)    | 43.8(19) | 81(2)    | 23.9(17) | -13.1(19) | 4.2(18)   |
| C7  | 51(2)    | 42.6(18) | 68(2)    | 20.8(16) | -10.9(16) | -9.1(16)  |
| C13 | 52(2)    | 52(2)    | 68(2)    | 23.9(17) | -2.5(18)  | 2.5(17)   |
| C16 | 54(2)    | 57(2)    | 62(2)    | 31.1(18) | -11.3(17) | -7.7(17)  |
| C6  | 49(2)    | 50(2)    | 81(2)    | 22.2(17) | 6.9(19)   | -3.0(19)  |
| C14 | 64(2)    | 59(2)    | 61(2)    | 41.8(18) | 5.1(17)   | 2.8(17)   |
| C24 | 43.4(19) | 37.7(17) | 59.1(19) | 16.9(14) | -7.3(15)  | 0.5(15)   |
| C3  | 46(2)    | 43.2(18) | 60(2)    | 18.7(16) | 2.9(16)   | 1.6(16)   |
| C5  | 57(2)    | 65(2)    | 72(2)    | 35(2)    | 14.4(18)  | -11(2)    |
| C17 | 56(2)    | 78(3)    | 72(2)    | 47(2)    | 12.7(17)  | 23.4(19)  |
| C15 | 65(2)    | 57(2)    | 57(2)    | 34.2(19) | 6.7(18)   | 6.5(17)   |
| C4  | 62(2)    | 51(2)    | 76(2)    | 23.5(19) | 9.5(18)   | -9.0(18)  |
| C8  | 56(2)    | 39.9(16) | 65.4(19) | 22.6(17) | -13.8(18) | 0.6(14)   |
| C11 | 65(3)    | 34.5(18) | 124(4)   | 15(2)    | -18(3)    | 4(2)      |
| C10 | 46.0(19) | 51(2)    | 82(3)    | 16.2(17) | -9.8(17)  | 5.8(18)   |
| C1  | 49(2)    | 56(2)    | 90(3)    | 22.7(17) | -1.6(19)  | -11.1(19) |
| C18 | 74(2)    | 79(3)    | 67(2)    | 54(2)    | 19(2)     | 24(2)     |
| C2  | 53(2)    | 53(2)    | 75(2)    | 15.8(18) | 11.3(17)  | -20.3(19) |

**Table SI 13: Bond Lengths for MOF 2.**

| Atom | Atom | Length/Å  | Atom | Atom | Length/Å |
|------|------|-----------|------|------|----------|
| Ni01 | Cl1  | 2.4733(9) | C12  | C7   | 1.420(5) |
| Ni01 | Cl11 | 2.4733(9) | C12  | C11  | 1.382(5) |
| Ni01 | N42  | 2.103(3)  | C7   | C6   | 1.454(5) |
| Ni01 | N43  | 2.103(3)  | C7   | C8   | 1.403(5) |
| Ni01 | N1   | 2.088(3)  | C13  | C24  | 1.485(5) |
| Ni01 | N11  | 2.088(3)  | C16  | C17  | 1.363(5) |
| N3   | C13  | 1.343(4)  | C16  | C15  | 1.364(5) |
| N3   | C16  | 1.426(4)  | C14  | C15  | 1.368(4) |
| N4   | C14  | 1.349(4)  | C24  | C8   | 1.383(5) |
| N4   | C18  | 1.336(4)  | C24  | C10  | 1.409(5) |
| N1   | C5   | 1.330(4)  | C3   | C4   | 1.379(5) |

|    |     |          |     |     |          |
|----|-----|----------|-----|-----|----------|
| N1 | C1  | 1.355(4) | C3  | C2  | 1.362(5) |
| O2 | C13 | 1.220(4) | C5  | C4  | 1.389(5) |
| N2 | C6  | 1.397(4) | C17 | C18 | 1.404(5) |
| N2 | C3  | 1.379(4) | C11 | C10 | 1.373(5) |
| O1 | C6  | 1.225(4) | C1  | C2  | 1.389(4) |

**Table SI 14: Bond Angles for MOF 2.**

| Atom | Atom | Atom  | Angle/°    | Atom | Atom | Atom | Angle/°  |
|------|------|-------|------------|------|------|------|----------|
| Cl1  | Ni01 | Cl11  | 179.44(5)  | O2   | C13  | N3   | 124.4(3) |
| N42  | Ni01 | Cl11  | 88.09(8)   | C24  | C13  | N3   | 115.1(3) |
| N43  | Ni01 | Cl11  | 92.31(8)   | C24  | C13  | O2   | 120.4(3) |
| N43  | Ni01 | Cl1   | 88.09(8)   | C17  | C16  | N3   | 116.3(3) |
| N42  | Ni01 | Cl1   | 92.31(8)   | C15  | C16  | N3   | 124.6(3) |
| N42  | Ni01 | N43   | 89.35(14)  | C15  | C16  | C17  | 119.0(3) |
| N11  | Ni01 | Cl1   | 90.32(8)   | O1   | C6   | N2   | 120.5(3) |
| N1   | Ni01 | Cl1   | 89.27(8)   | C7   | C6   | N2   | 114.7(3) |
| N11  | Ni01 | Cl11  | 89.27(8)   | C7   | C6   | O1   | 124.8(3) |
| N1   | Ni01 | Cl11  | 90.32(8)   | C15  | C14  | N4   | 123.7(3) |
| N1   | Ni01 | N43   | 90.78(10)  | C8   | C24  | C13  | 122.4(3) |
| N11  | Ni01 | N43   | 178.41(11) | C10  | C24  | C13  | 118.7(3) |
| N1   | Ni01 | N42   | 178.41(11) | C10  | C24  | C8   | 118.8(3) |
| N11  | Ni01 | N42   | 90.78(10)  | C4   | C3   | N2   | 125.1(3) |
| N11  | Ni01 | N1    | 89.13(15)  | C2   | C3   | N2   | 117.1(3) |
| C16  | N3   | C13   | 126.9(3)   | C2   | C3   | C4   | 117.8(3) |
| C14  | N4   | Ni014 | 122.5(2)   | C4   | C5   | N1   | 124.2(3) |
| C18  | N4   | Ni014 | 120.8(2)   | C18  | C17  | C16  | 119.1(3) |
| C18  | N4   | C14   | 116.7(3)   | C14  | C15  | C16  | 119.2(3) |
| C5   | N1   | Ni01  | 123.3(2)   | C5   | C4   | C3   | 119.4(3) |

|     |     |      |          |     |     |     |          |
|-----|-----|------|----------|-----|-----|-----|----------|
| C1  | N1  | Ni01 | 121.5(2) | C24 | C8  | C7  | 121.8(3) |
| C1  | N1  | C5   | 115.2(3) | C10 | C11 | C12 | 122.0(3) |
| C3  | N2  | C6   | 129.4(3) | C11 | C10 | C24 | 119.7(3) |
| C11 | C12 | C7   | 119.1(3) | C2  | C1  | N1  | 123.8(3) |
| C6  | C7  | C12  | 118.2(3) | C17 | C18 | N4  | 122.3(3) |
| C8  | C7  | C12  | 118.2(3) | C1  | C2  | C3  | 119.5(3) |

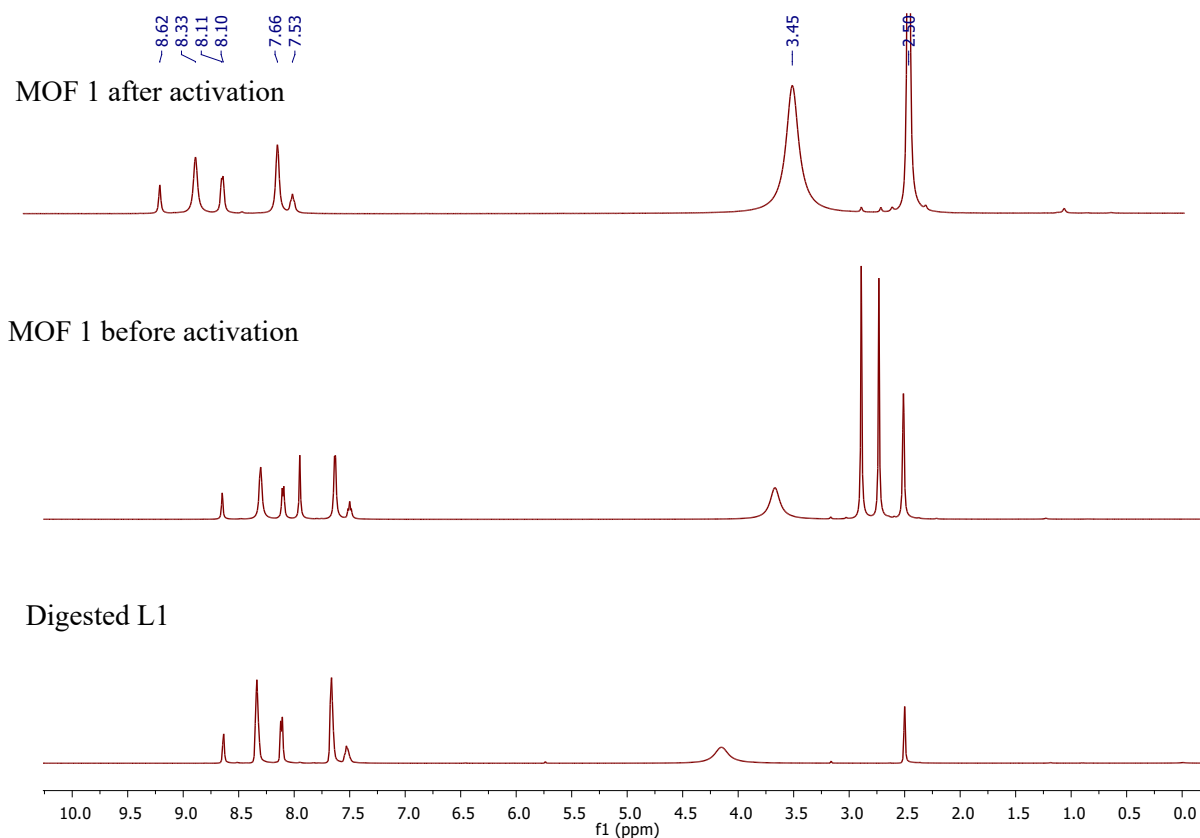

**Figure SI 5:**  $^1\text{H}$  NMR spectra of digested ligand **L1**, **MOF 1** before and after activation recorded in  $\text{DMSO-d}_6$ .

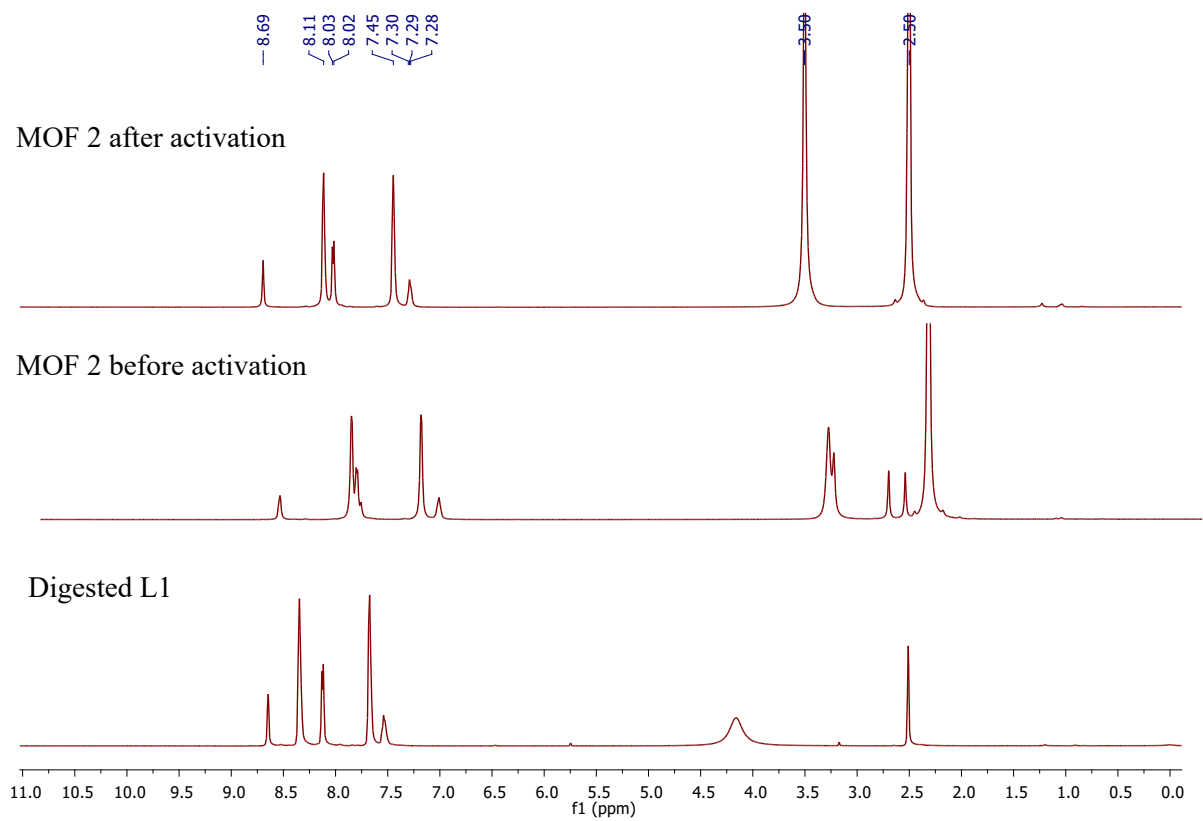

**Figure SI 6:**  $^1\text{H}$  NMR spectra of digested ligand L1, MOF 2 before and after activation recorded in  $\text{DMSO-d}_6$ .

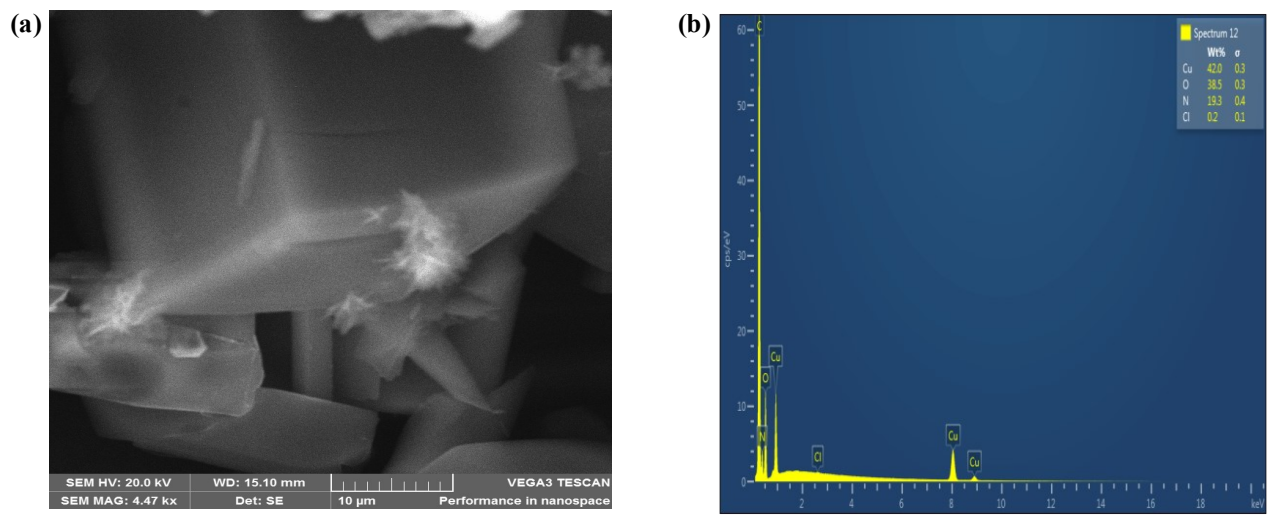

**Figure SI 7:** SEM-EDX images for MOF 1.

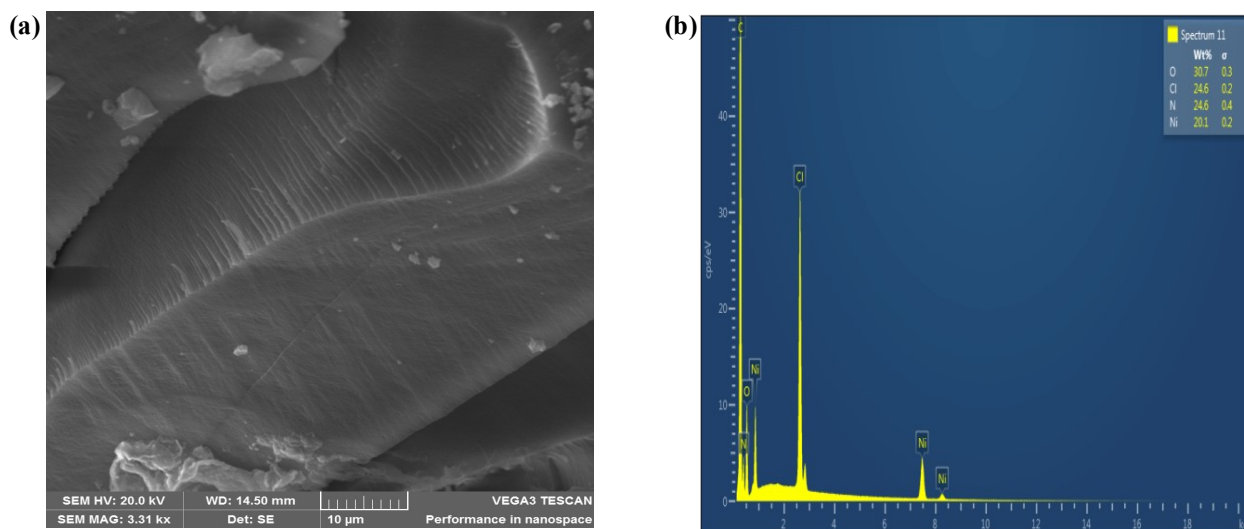

**Figure SI 8:** SEM-EDX images for MOF 2.

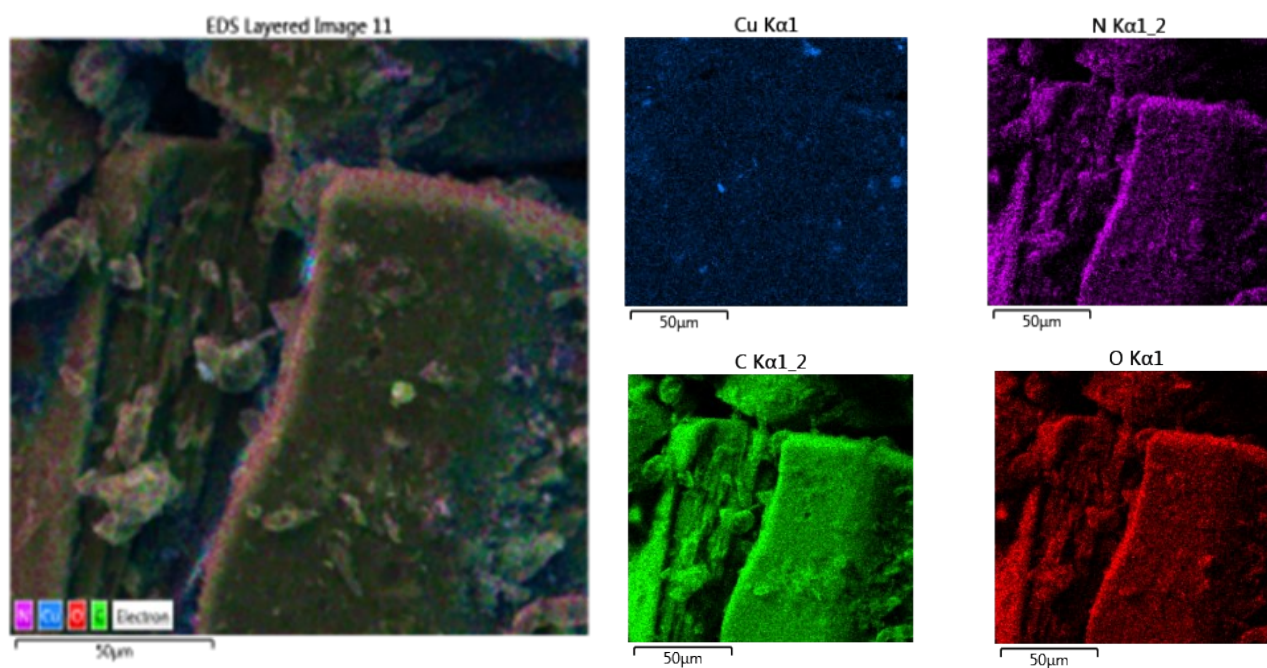

**Figure SI 9:** EDX mapping images for MOF 1.

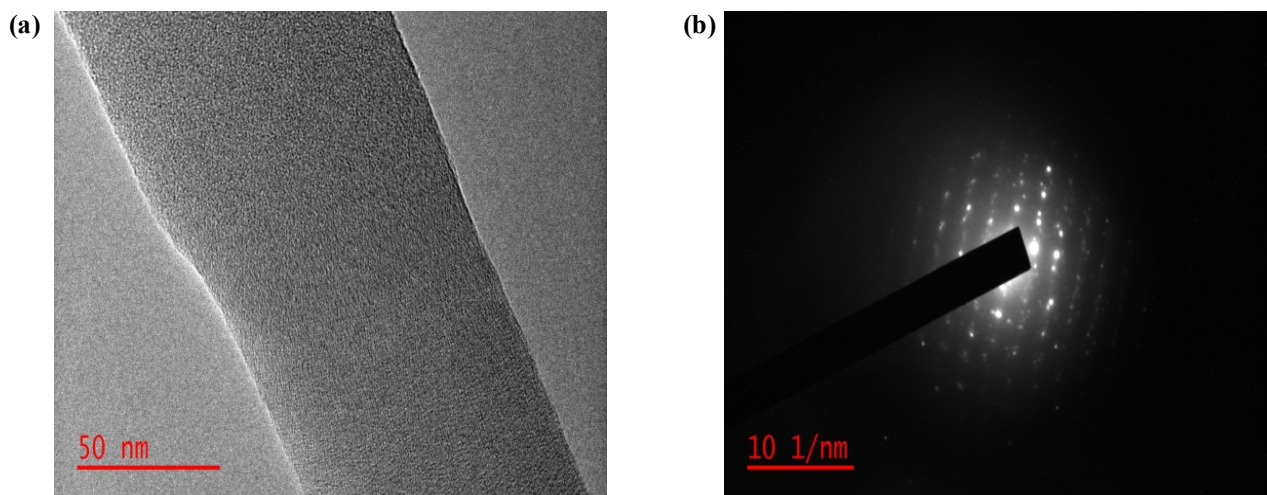

**Figure SI 10:** HR-TEM and SAED images of **MOF 1**.

### Catalytic hydrogenation of furfural

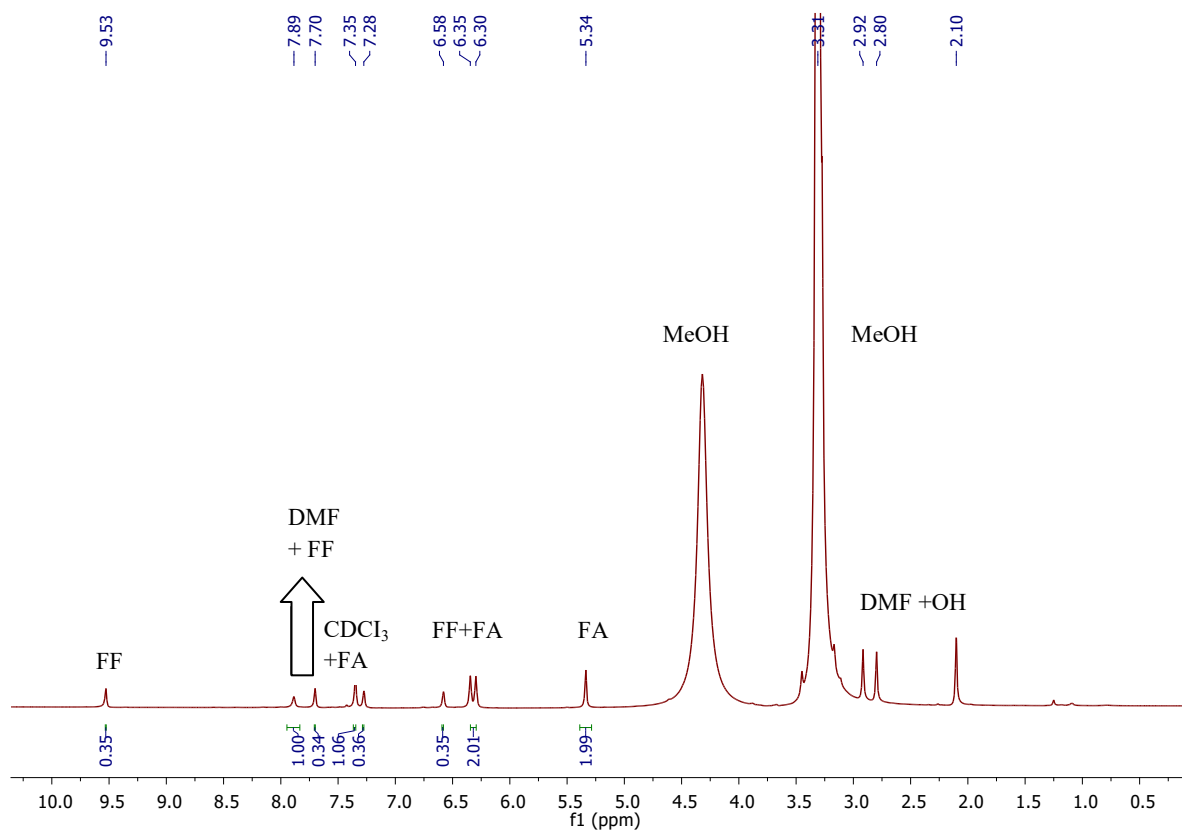

**Figure SI 11:** Representative <sup>1</sup>H NMR of the hydrogenation of FF reaction using molecular H<sub>2</sub>, 140 °C, methanol (5 mL), substrate (FF, 2.5 mmol), pre-catalyst (**MOF 2**), time (24 hours), showing product of FA only, recorded in CDCl<sub>3</sub>.

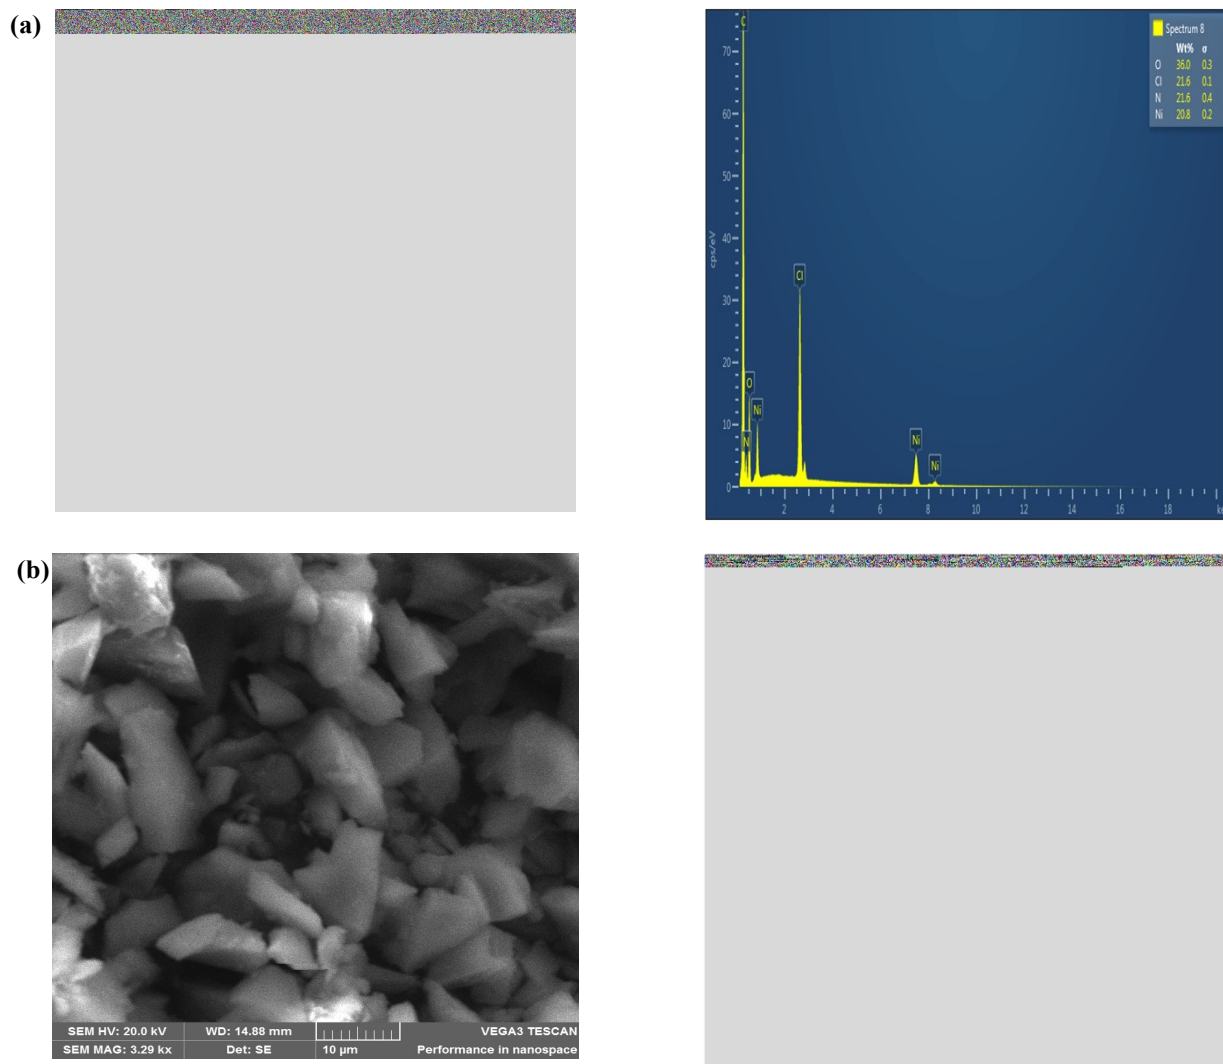

**Figure SI 12:** SEM-EDX images for (a) **MOF 2** before catalysis and (b) **MOF 2** after the 4<sup>th</sup> recycle.



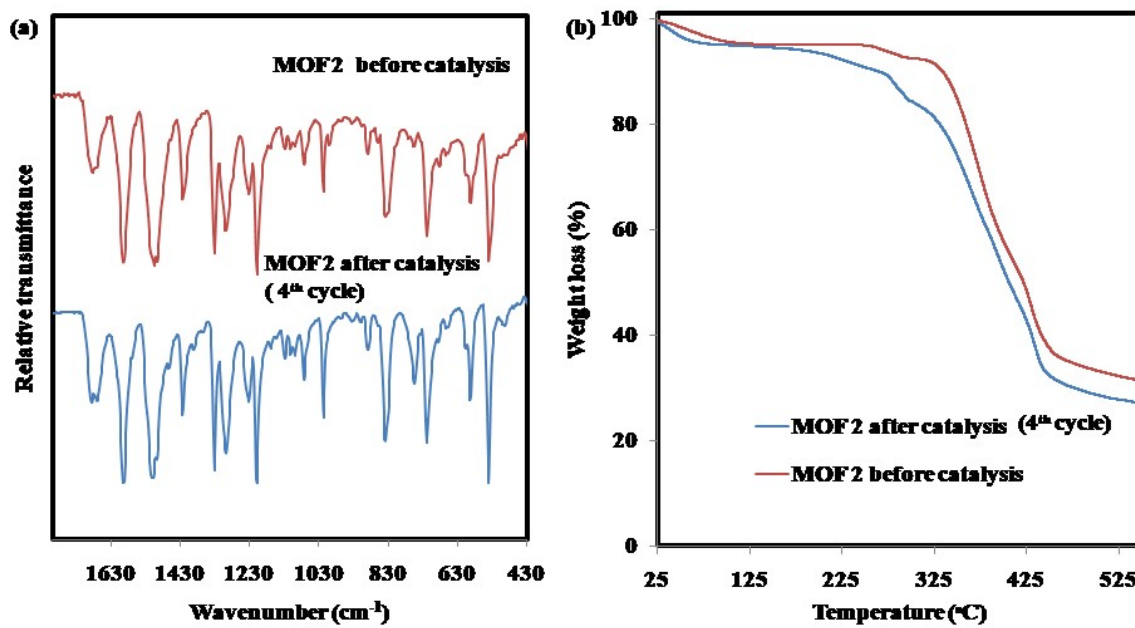

Figure SI 13: (a) FT-IR spectra and (b) TGA curves of the MOF 2 before and after the 4<sup>th</sup> recycle.
